# Supplementary material for: A single gene of a commensal microbe affects host susceptibility to enteric infection
Source: PubMed Central journal article supplement (PMC5482719; doi:10.1038/ncomms11606), 2016-05-13
Supplement: ncomms11606-s1.pdf [file ncomms11606-s1.pdf]

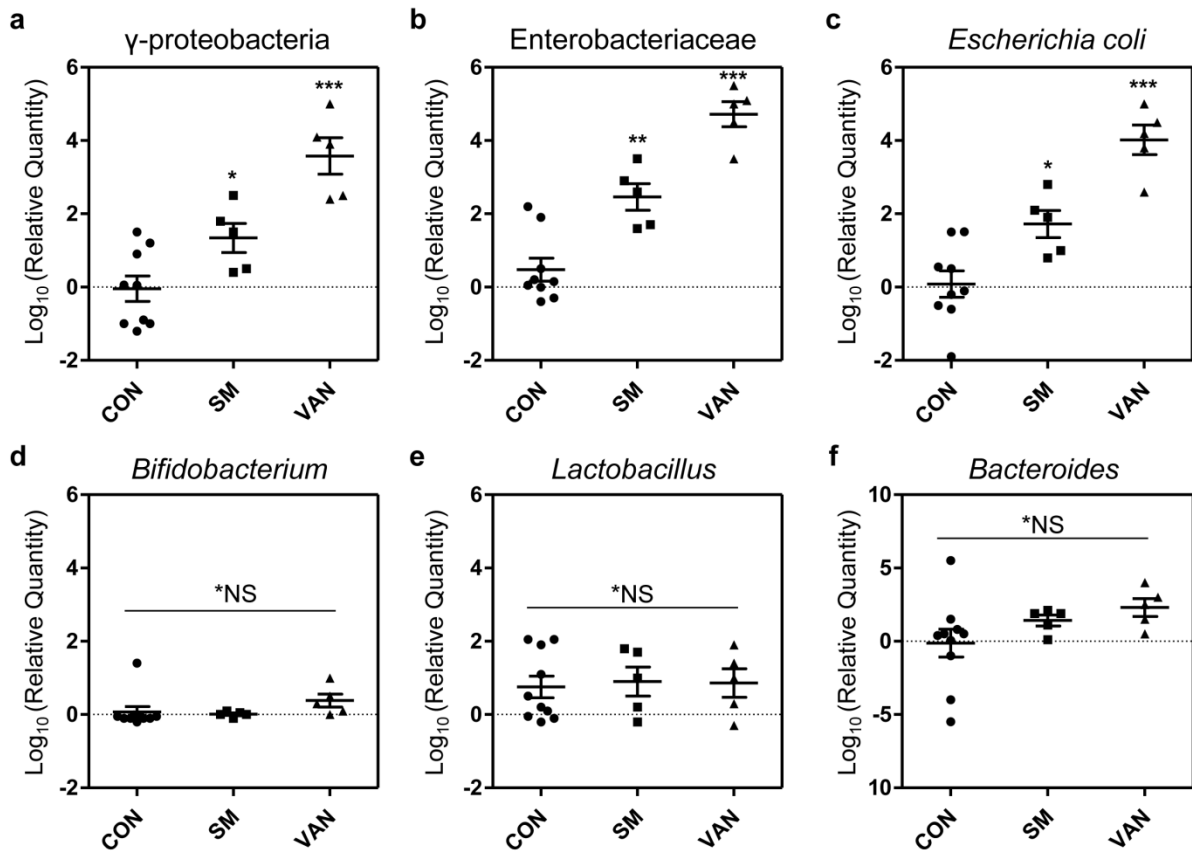

**Supplementary Figure 1. Relative quantities of the indicated groups of bacteria in SI tissue homogenates.** Adult mice (n=5) were treated with SM or VAN as described in Fig. 1A. Untreated mice were used as controls. The copy numbers of the 16S rRNA gene of  $\gamma$ -proteobacteria (a), Enterobacteriaceae (b), *E. coli* (c), *Bifidobacterium* (d), *Lactobacillus* (e) and *Bacteroides* (f) were determined by real-time PCR and normalized to that of host *gapdh*. Values are expressed as means  $\pm$  SEMs and are displayed on a log scale. \* $P < 0.05$ , \*\* $P < 0.005$ , \*\*\* $P < 0.001$  vs. the relative quantities of the control group for each panel. \*NS, not significantly different between the groups as determined by ANOVA.

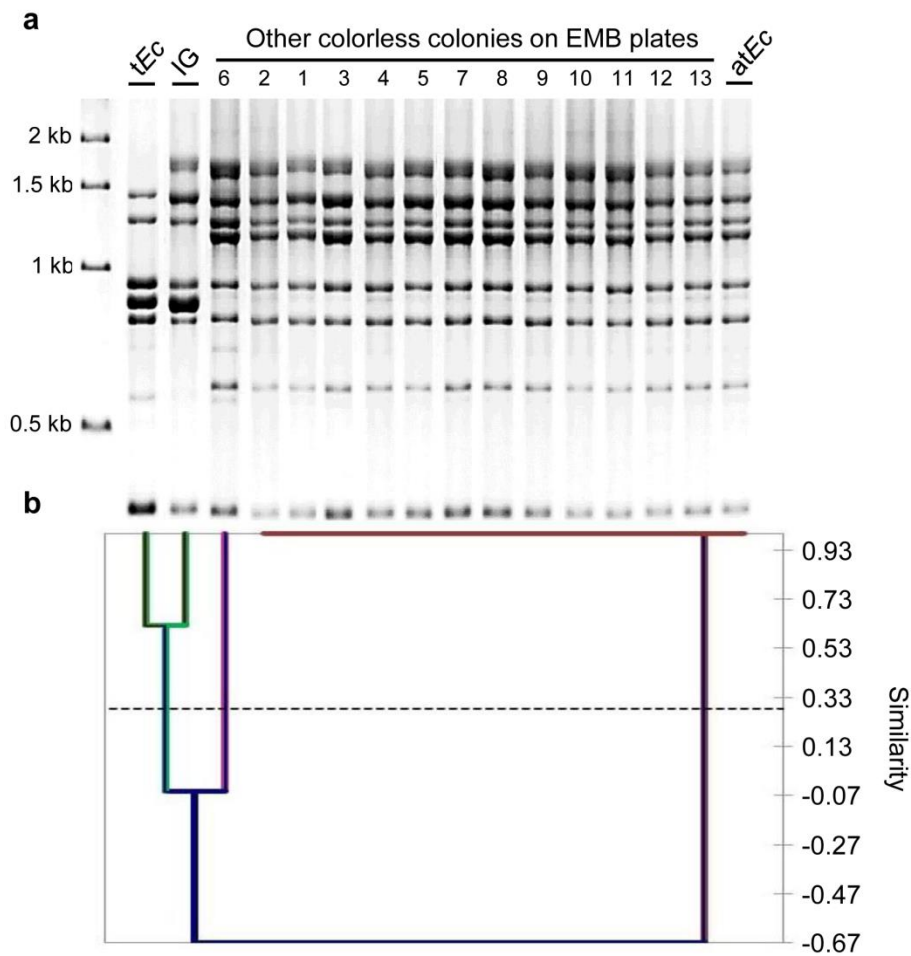

**Supplementary Figure 2. Genome typing of *E. coli* cells growing as colorless colonies.** (a) RAPD amplification products. The RAPD reaction was performed as described in Methods with the primers listed in Supplementary Table 1. Reaction products were analyzed on agarose gels. A total of 14 colorless colonies (including “atEc” in the far right lane; the genome of this strain was fully sequenced) were included in the assay. In addition, one colony exhibiting the typical *E. coli* growth phenotype on EMB plates (“tEc”) and one intermediate green colony isolated from the feces of VAN-treated mice (“IG”) were analyzed. (b) Dendrogram based on RAPD analysis. Thirteen of the colorless strains, including atEc, shared 100% genomic similarity. However, strain 6 was an exception.

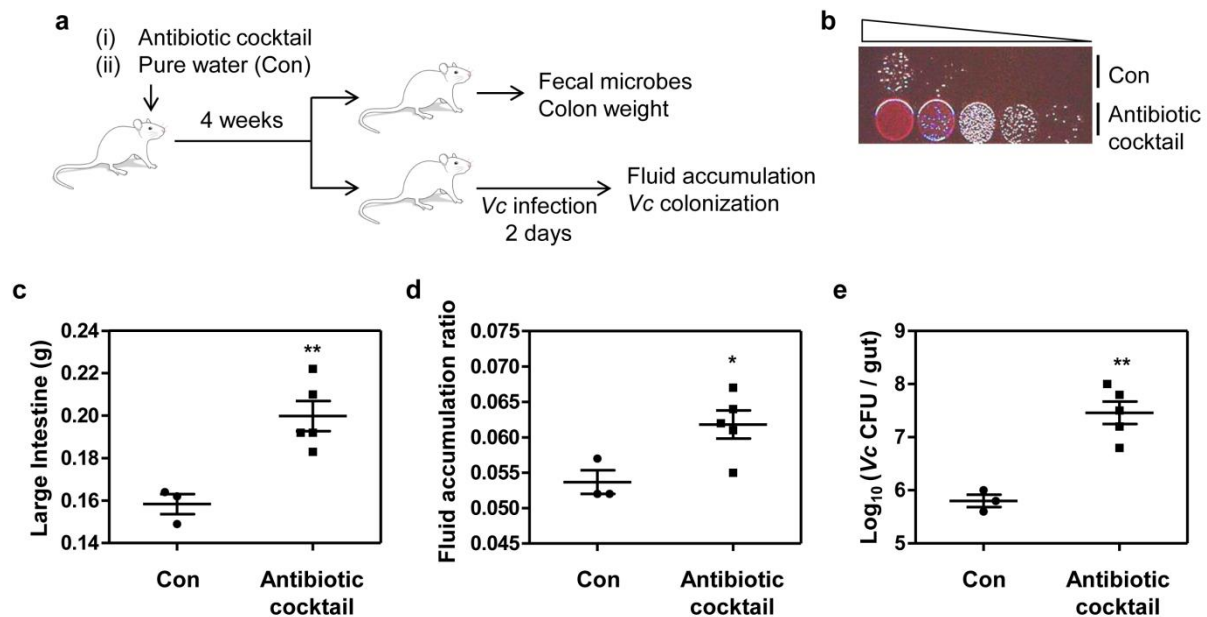

**Supplementary Figure 3. Atypical *E. coli* cells proliferate in mice treated with a mixture of 4 antibiotics.** (a) Schematic diagram of the experimental procedure. Four-week-old female Balb/c mice were treated with an antibiotic cocktail (ampicillin, 100 µg/mL; vancomycin, 10 µg/mL; metronidazole, 50 µg/mL; and neomycin, 30 µg/mL) for 4 weeks. Antibiotics were administered in the drinking water. (b) Representative EMB plate showing substantial proliferation of colorless atypical *E. coli* strains after antibiotic treatment. Aliquots of mouse fecal suspensions were serially diluted and spotted onto EMB plates. (c) The large intestine was removed from each control (n=3) or antibiotic-treated mouse (n=5) and weighed. Values are expressed as means ± SEMs and are displayed on a linear scale. \*\* $P < 0.01$  vs. control mice. (d) Antibiotic-treated (n=5) and control (n=3) mice were challenged with Vc. On day 2 post-infection, the fluid accumulation (FA) ratio of each group was measured and is plotted on a linear scale. \* $P < 0.05$  vs. the FA ratio of the Vc-infected control group. (e) Vc colonization in each group. The number of Vc CFUs was determined by plating serial dilutions of intestinal homogenates onto LB plates supplemented with 200 µg/mL SM. Values are expressed as means ± SEMs and are displayed on a log scale. \* $P < 0.005$  vs. Vc CFUs from the control group.

**a. Genome information**

|                    | size    | GC contents | CDS   |
|--------------------|---------|-------------|-------|
| <i>tEc</i>         | 4.72 Mb | 50.65 %     | 4,403 |
| <i>atEc</i>        | 5.24 Mb | 50.56 %     | 5,019 |
| <i>E. coli</i> K12 | 4.64 Mb | 50.79 %     | 4,299 |

**b. MUMmer dot plot**

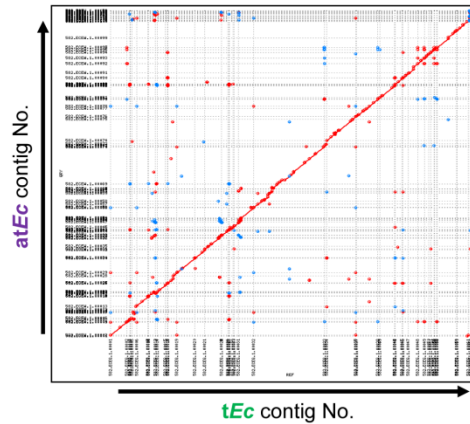

**c. Genetic structure of *lac* operon**

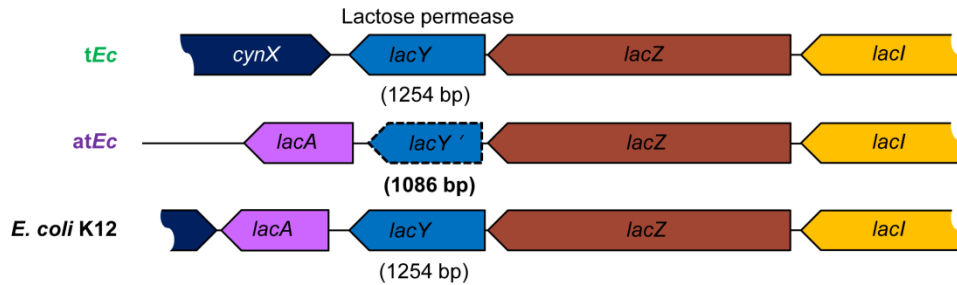

**Supplementary Figure 4. Whole genome sequencing provides an explanation for why the *atEc* strain forms colorless colonies on EMB plates.** (a) Comparison of the genome sequences of the *atEc*, *tEc*, and K12 strains. (b) Alignment of the *atEc* and *tEc* genomes using the Maximal Unique Match (MUM) system, which extracts the longest possible nucleotide matches of both genomes. Each dot represents a match between the two genomes. Red and blue dots indicate matches in the forward and reverse direction, respectively. (c) Comparison of the genetic structures of the *lac* operons of the different strains. The *lacY* gene of the *atEc* strain was truncated (dotted line), while the *tEc* strain harbored an intact *lacY* gene. The length and direction of each arrow indicate the relative size and transcriptional direction of each gene.

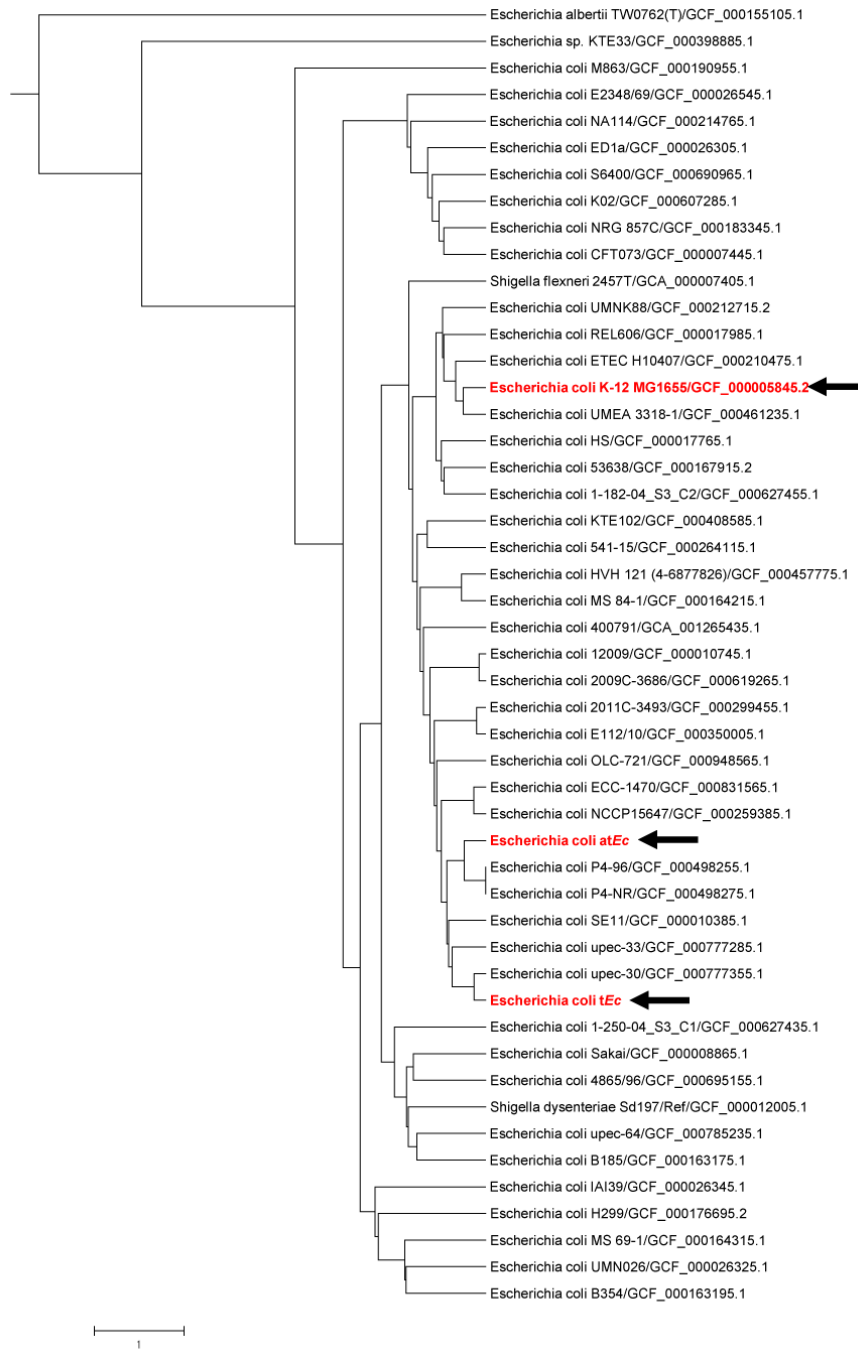

**Supplementary Figure 5. Genome-based phylogenetic relationship of atEc, tEc strains with other representative *E. coli* and *Shigella* strains.** Three *E. coli* strains, whose genomes were compared in Fig. S4A, were indicated with black arrows. The dendrogram was constructed based on average nucleotide identity (ANI) values.

**a. Catalase genes**

|                    | KatE                | KatG                | extra KatE (eKatE) |
|--------------------|---------------------|---------------------|--------------------|
| <i>tEc</i>         | 753 aa<br>(750/753) | 726 aa<br>(725/726) |                    |
| <i>atEc</i>        | 753 aa<br>(749/753) | 726 aa<br>(725/726) | 750 aa             |
| <i>E. coli</i> K12 | 753 aa              | 726 aa              |                    |

**b**

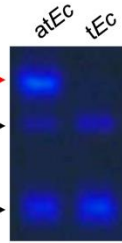

**c. Amino acid sequence alignment of eKatE and KatE**

```

KatE      NSQHNKFNPHQSPHSDSSEAKPGMDSLAPEDGSHRPAEPTPPGAQPTAPGSLKAPDT
eKatE     M I KKNKADFTSNGSNKKA I STVEPHYEDTAPAKEY I KSLT S I SPPGVPEHMPGSDKTPKN
* : : : : : * : : : : * : : : : : : : : : : : : : : : : : : : : : : : : : : :

KatE      RNEKLSLEDVFKGSENYALT NQGVRI A DQNSLRA GNRGPTLLEDF I LREK I THFDHE
eKatE     RNEKLTQLDKFFAPQGESLRTNQGVI SDQNSLSKSGRSTLLEDF I LREK I THFDHE
*****:.....:.....:.....:.....:.....:.....:.....:.....:.....:.....:.....

KatE      RI PER I V HARGSA AHGV FQPYKLSDI TKADFL SDPNKI TPVVFVSTVGGAGSADTVR
eKatE     RI I PERVYHARGTGAHV FQVY ESLASYTTAEFLQDPSYKTPVVFVSTVGGSRGSADTVR
*****:.....:.....:.....:.....:.....:.....:.....:.....:.....:.....:.....

KatE      D I RGFAT KFYT EEGI FDLVGNNTPI FF I QDAHKFPDFVHAVKPEPHAI PQGQSAHDTF#
eKatE     D I RGFAT KFYT KEGT FDLVGNNTPVYFF I QDA I KFPDFVHAVKPEPHNEI PQGQSAHDTF#
*****:.....:.....:.....:.....:.....:.....:.....:.....:.....:.....:.....

KatE      DYVSLQPETLHWMIWMSDRGI PRSYRTMEGFG I HTFPL I NAEQKATVYFHWKPLAGKA
eKatE     DYVSLQPETLHWMIWMSDRGI PRSYRMMEGFG I HTVVM I NAEQGHFI FFWKPYVGVYS
*****:.....:.....:.....:.....:.....:.....:.....:.....:.....:.....:.....

KatE      SLVWDEAKLTDGRDPFHRRELVEA I EAGDFPEVELGFL I PEEDEFKDFDLDLPTKL I
eKatE     SL I WDEAQLTGDGDFHRRELVES I EAGDVPVELGLQ I I PEEDEHKDFDI LDPTKL I
*****:.....:.....:.....:.....:.....:.....:.....:.....:.....:.....:.....

KatE      PEELVYQRYGKMYLNINPQWFAENEQAFFPHGI V PGLDFTNDPLLOGRLFSY I DTQ I
eKatE     PESLVYPYHLVGNMYLNINPQWVSETEQWAFQGN I V PGI DFDSDPLLOGRLFSY I DTQ I
** : : * : : * : : * : : * : : * : : * : : * : : * : : * : : * : : * : :

KatE      SRLGGNPFHEI P I NRPT CPYHNFQRDGMHRMGI DTPANVFNPS I NDNWPRETPPQPKRG
eKatE     SRLGGNPFHEI P I NKPI CPFHNRQRDGMHRMGI SG-TANVFNPS I NDNWPREAPP---TEG
*****:.....:.....:.....:.....:.....:.....:.....:.....:.....:.....:.....

KatE      GFESYQERVEGKVIERSPSFGEVYSHRFLWLSQIPFEQRHI VDGFSFELSKVYHPY I R
eKatE     GF I TYQRPVNGVYKSRKRSSTF I DYSQPRFLWLSQITKVEQNH I VDGFSFELSKVYHPY I R
** : : * : : * : : * : : * : : * : : * : : * : : * : : * : : * : : * : :

KatE      ERVYDQLAHLDTLAQA VAKNLGI ELTDDQLNI TPPPVDVNSLKKDPSLSLYA I PDGQVKG
eKatE     ERVYNQLTY I DHQLAQSVADNLGI KLSQEQKHPGPI NGLSKDPSLSMVDGHHQ I LKS
*****:.....:.....:.....:.....:.....:.....:.....:.....:.....:.....:.....

KatE      RYVATLLNDEVRSADLLA I LKALKAGVHAKLLYSRMGEVTDGDTVLP I AATFAGAPSL
eKatE     RQVATLAADGVCGDA I DNI MKTLKQVGVHGI FAFPHGR I TSLQGNIEVNGT I EGNPSY
***** : : : : : * : : * : : * : : * : : * : : * : : * : : * : : * : : * : :

KatE      TVDQV I VPCG--N I ADI ADNGDANVYLMEAVKHLKPI ALAGDARFKKAT I KVAQDQEEGI
eKatE     MYDQV I I PDGEDS I DLSMKNGNAKHYY I QAFKHLKAI GLOKAKFLYDA LPLPKPDEGI V
***** * : : : * : : * : : * : : * : : * : : * : : * : : * : : * : : * : :

KatE      YEADSDQSFNDELLTLMAHRVWSRI PK I DKI PA
eKatE     VGDKAAD---LAEAFQWVRGHR I WSRESVAQE I AG
* : : * : : : : : * : : * : : : : :
    
```

**d. Nucleotide sequence identity of *atEc* *eKatE* gene**

|                            | <i>E. coli</i> <i>atEc</i> | <i>E. coli</i> K02 | <i>Serratia</i> sp. SCBI | <i>Frankia</i> sp. BMG5.23 |
|----------------------------|----------------------------|--------------------|--------------------------|----------------------------|
| <i>E. coli</i> <i>atEc</i> |                            | 0/2253*            | 160/2250                 | 160/2250                   |
| <i>E. coli</i> K02         | 100%                       |                    | 160/2250                 | 160/2250                   |
| <i>Serratia</i> sp. SCBI   | 92.89%                     | 92.89%             |                          | 0/2250                     |
| <i>Frankia</i> sp. BMG5.23 | 92.89%                     | 92.89%             | 100%                     |                            |

\* No. of different nucleotides/No. of nucleotides compared

**Supplementary Figure 6. The *atEc* strain harbors an extra catalase-encoding gene. (a)** The *atEc* strain possesses three catalase genes, while the *tEc* and K12 strains have two. The amino acid (aa) length of each catalase is indicated and the number of identical residues compared to the corresponding K12 protein is shown in parentheses. **(b)** In-gel catalase activity assay. Proteins in bacterial extracts were separated by native gel electrophoresis and catalase-specific bands were stained as described in the Methods section. Three distinct bands are shown in the left lane of the gel (*atEc* cell lysate). **(c)** Amino acid sequence alignment of KatE and eKatE. **(d)** The top 3 genes exhibiting the highest sequence identities to the *eKatE* gene. To identify similar genes, the NCBI database was searched using the BLASTn algorithm.

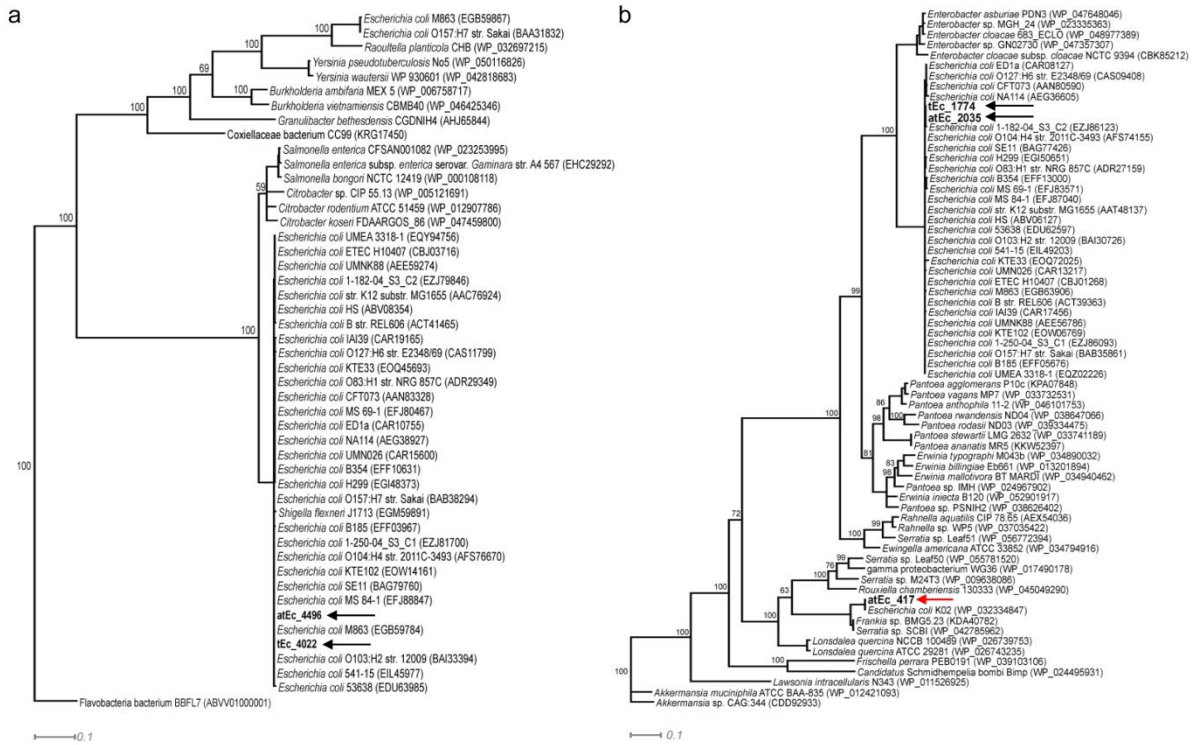

**Supplementary Figure 7. Maximum likelihood trees of *E. coli* and related taxa constructed using the amino acid alignments of KatG (a) and KatE (b) proteins.** Numbers above branches show maximum-likelihood bootstrap supports from 1,000 non-parametric replicates (shown only if they were > 50). The trees were rooted by outgroups *Flavobacterium bacterium* BBFL7 (a) and *Akkermansia* sp. CAG:344 (b). Accession numbers of protein sequences are indicated between parentheses. The scale represents the number of substitutions per site. KatG and KatE proteins from atEc and tEc strains are shown with black arrows. The eKatE protein from atEc strain is shown with red arrow.

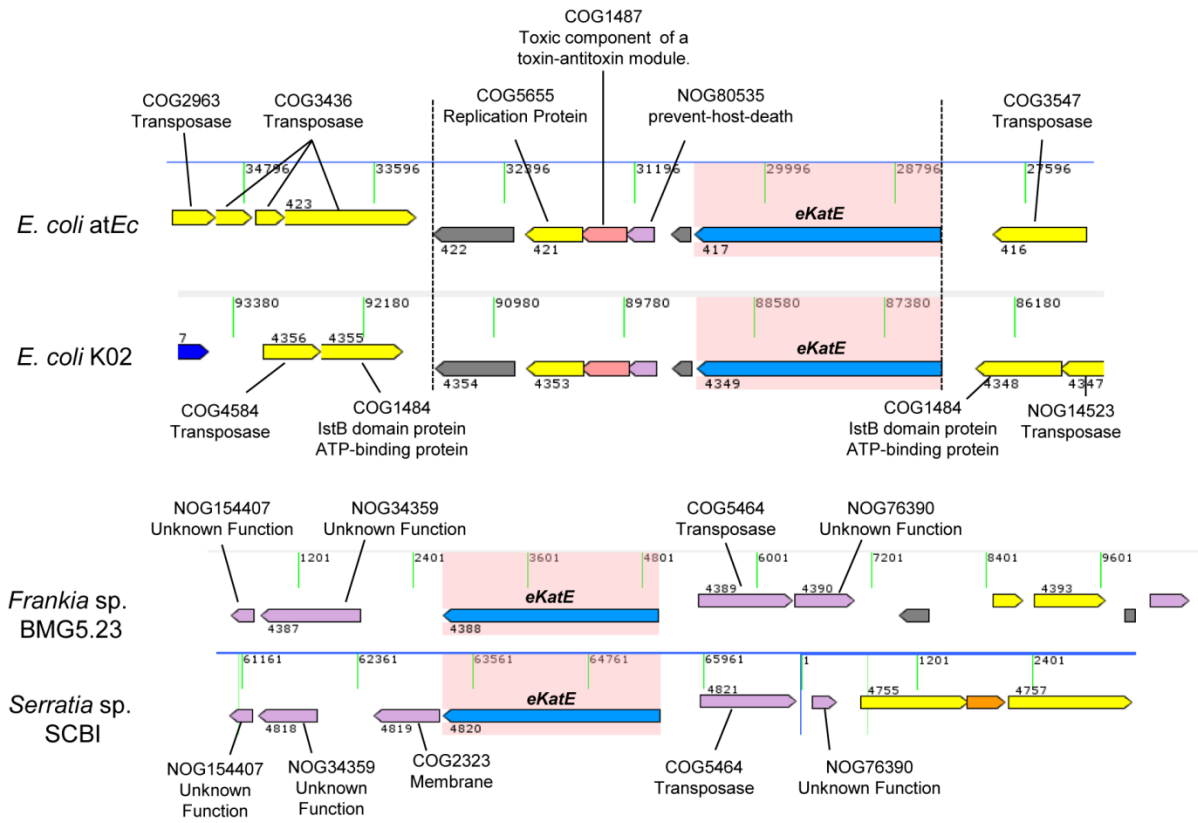

**Supplementary Figure 8. Synteny comparison of *eKatE* genetic loci among *atEc*, *K02*, *Frankia sp. BMG5.23* and *Serratia sp. SCBI*. The *eKatE* genes (marked in blue arrows) and neighboring genes with annotation are displayed in each genome. Regions shown between two vertical dotted lines are identical in *atEc* and *K02* strains.**



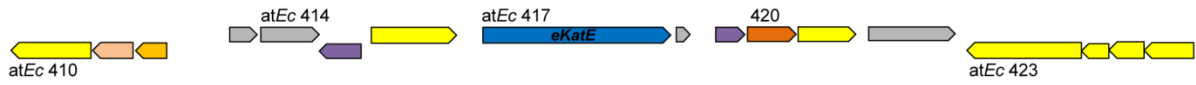

| Gene            | Size (bp)    | Function                                         |
|-----------------|--------------|--------------------------------------------------|
| atEc 410        | 807          | resolvase, site-specific recombinase XerD        |
| atEc 411        | 306          | CcdB                                             |
| atEc 412        | 219          | plasmid maintenance protein CcdA                 |
| atEc 413        | 258          | hypothetical protein                             |
| atEc 414        | 591          | hypothetical protein                             |
| atEc 415        | 348          | hypothetical protein                             |
| atEc 416        | 855          | transposase                                      |
| <b>atEc 417</b> | <b>2,253</b> | <b>eKatE</b>                                     |
| atEc 418        | 162          | hypothetical protein                             |
| atEc 419        | 255          | prevent-host-death                               |
| atEc 420        | 423          | toxic component of a toxin-antitoxin (TA) module |
| atEc 421        | 513          | replication Protein                              |
| atEc 422        | 729          | hypothetical protein                             |
| atEc 423        | 1,260        | transposase                                      |
| atEc 424        | 249          | transposase                                      |
| atEc 425        | 348          | transposase                                      |
| atEc 426        | 381          | transposase                                      |

**Supplementary Figure 9. A high-resolution physical map of the *eKatE* gene locus in the *atEc* chromosome.** In the table, gene numbers, gene sizes (in bp) and putative functions are presented. Genes involved in transposition are shown with gray highlights, while those involved in plasmid maintenance are shown with orange highlights.

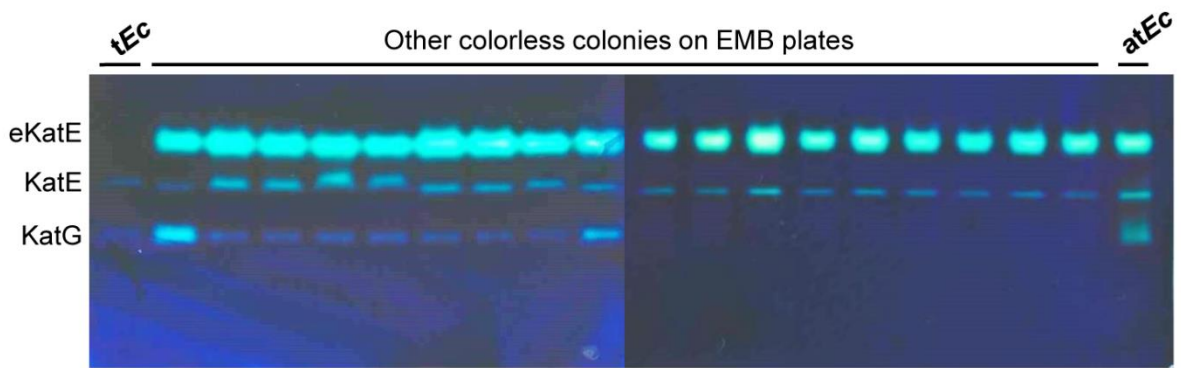

**Supplementary Figure 10. Native gel-based catalase assay.** All other *E. coli* strains (n=18) that formed colorless colonies on EMB plates produced eKatE. The native gel-based catalase activity assay was performed as described in Fig. 5A.

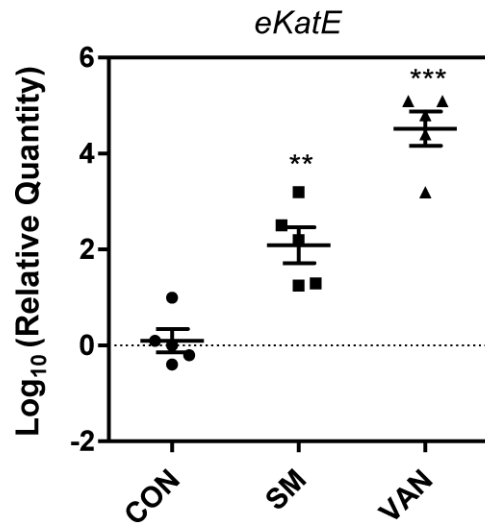

**Supplementary Figure 11. Relative quantities of the *eKatE* gene present in SI tissue homogenates (n=5) as determined by real-time PCR.** The level of mouse *gapdh* in each sample was used for normalization. The ratios of *eKatE* to host *gapdh* are displayed on a log scale (means ± SEMs). \*\* $P < 0.005$ , \*\*\* $P < 0.001$  vs. the control group.

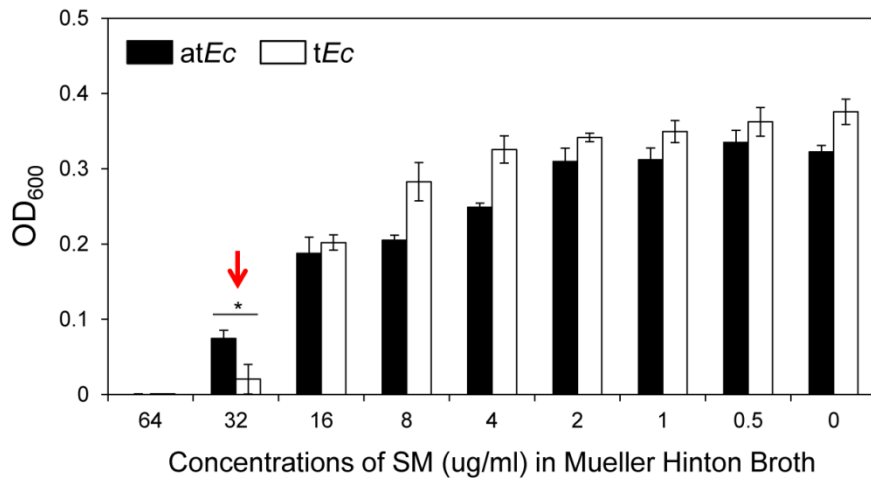

**Supplementary Figure 12. Bacterial growth of *atEc* and *tEc* strains in the presence of increasing amounts of SM.** Strains were grown in Mueller Hinton Broth, which has been commonly used for antibiotic sensitivity assay. \* $P < 0.05$  between two growths.

**Supplementary Table 1.** Primers used in this study

| 1. Cloning                                                                              |                 |                                            |
|-----------------------------------------------------------------------------------------|-----------------|--------------------------------------------|
| Deletion of <i>eKatE</i> gene in <i>atEc</i> (5' to 3')*                                |                 |                                            |
| left-flanking region                                                                    |                 | F: ATATAGAGCTCGATGATATGAACGGCTCACCGG       |
|                                                                                         |                 | R: TAAATGGATCCCTTTTCGGCAGGTGCAGTATC        |
| right-flanking region                                                                   |                 | F: CCCTTGGATCCATGATGCGTTGCCGTTGCCCAA       |
|                                                                                         |                 | R: ACACGAGCTCGACTTGTGTAGTAACGTTACTACG      |
| Construction of P <sub>ctxAB</sub> :: <i>luxCDABE</i> transcriptional fusion (5' to 3') |                 |                                            |
| P <sub>ctxAB</sub>                                                                      |                 | F: CACATGAATTCACTATCGAGTCAGAGCAATCCG       |
|                                                                                         |                 | R: ATTGGTCTAGATTGTTAACAGAAAAATAATTGATCAAAC |
| <i>luxCDABE</i>                                                                         |                 | F: ATTCGTCGACACTAAAAAATTTTCATTATT          |
|                                                                                         |                 | R: GATATGAGCTCTACTCAGGAGAGCGTTCAC          |
| Construction of Vc N16961 strain containing chromosomally encoded <i>ekatE</i> gene     |                 |                                            |
| <i>atEc ekatE</i>                                                                       |                 | F: CATATGAATTCGGCAAGCCCACTTATCGTCAA        |
|                                                                                         |                 | R: CAATTAAGCTTTTAGCCAGCAATTTCTGTGCT        |
| VC0512 600bp                                                                            |                 | F: AATTCGAATTCCTGAGGGAGCACTCCTGATAAG       |
|                                                                                         |                 | R: GATATGAGCTCCTGAGGCATCCATATCGGAAC        |
| Construction of t <i>Ec</i> strain that express the <i>ekatE</i> gene                   |                 |                                            |
| pBAD24:: <i>ekatE</i>                                                                   |                 | F: AATTCGAGCTCGGCAAGCCCACTTATCGTCAA        |
|                                                                                         |                 | R: ATATCGAGCTCTGTCTTACAGGTGGATGGCCT        |
| 2. Quantitative real-time PCR                                                           |                 |                                            |
| Organisms                                                                               | Target Genes    | Sequences (5' to 3')                       |
| Mus musculus                                                                            | <i>gapdh</i>    | F: GTGTTCTACCCCAATGTGT                     |
|                                                                                         |                 | R: ATTGTCATACCAGGAAATGAGCTT                |
| γ-Proteobacteria                                                                        | 16S <i>rRNA</i> | F: <b>CM</b> ATGCCGCGTGTGTGAA**            |
|                                                                                         |                 | R: ACTCCCCAGGCGGT <b>CD</b> ACTTA***       |
| Enterobacteriaceae                                                                      | 16S <i>rRNA</i> | F: GTTAATACCTTTGCTCATTGA                   |
|                                                                                         |                 | R: ACCAGGGTATCTAATCCTGTT                   |
| <i>E. coli</i>                                                                          | 16S <i>rRNA</i> | F: CAGCCACACTGGAAGTGAAGA                   |
|                                                                                         |                 | R: GTTAGCCGGTGCTTCTTCTG                    |
| <i>Bacteroides</i>                                                                      | 16S <i>rRNA</i> | F: AACGCTAGCTACAGGCTT                      |
|                                                                                         |                 | R: CAATCGGAGTTCTTCGTG                      |
| <i>Lactobacillus</i>                                                                    | 16S <i>rRNA</i> | F: AGCAGTAGGGAATCTTCCA                     |
|                                                                                         |                 | R: CACCGCTACACATGGAG                       |
| <i>Bifidobacterium</i>                                                                  | 16S <i>rRNA</i> | F: TCGCGTCYGGTGTGAAAG                      |
|                                                                                         |                 | R: CCACATCCAGCRTCCAC                       |
| <i>Vibrio cholerae</i>                                                                  | 16S <i>rRNA</i> | F: CTGGAAGTGAACACCGGTCC                    |
|                                                                                         |                 | R: CATGCGCTTTACGCCAGTA                     |
| <i>atEc</i>                                                                             | <i>eKatE</i>    | F: GAGTCTTTGGTCCCGTTCA                     |
|                                                                                         |                 | R: ACTCCTCCCAAACGGCTAAT                    |
| 3. RAPD                                                                                 |                 |                                            |
| M13 primer                                                                              |                 | 5'- GAGGGTGGCGTCT                          |

F, forward; R, reverse.

\* Restriction enzyme recognition sequences are underlined.

\*\*M is either A or C.

\*\*\*D is either G, A or T.



**Supplementary Table 3.** Codon adaptation index (CAI) and GC contents of catalase genes in *atEc* strain.

| Genes               | Size (bp) | CAI          | %G+C        |
|---------------------|-----------|--------------|-------------|
| <i>katE</i>         | 2,262     | 0.751        | 51.5        |
| <i>katG</i>         | 2,181     | 0.812        | 55.8        |
| <b><i>eKatE</i></b> | 2,253     | <b>0.671</b> | <b>43.6</b> |

**Supplementary Table 4. Genes involved in oxidative stress responses**

| Genes in atEc    | Genes in tEc | Function                                                              | eggNOG ID      |
|------------------|--------------|-----------------------------------------------------------------------|----------------|
| atEc_0008        | tEc_4463     | Aerobic respiration control protein arcA                              | COG0745        |
| atEc_0025        | tEc_0012     | Hydrogen peroxide-inducible genes activator                           | COG0583        |
| atEc_0189        | tEc_0177     | Lactoylglutathione lyase (EC 4.4.1.5)                                 | COG0346        |
| atEc_0212        | tEc_0199     | Hydroxyacylglutathione hydrolase (EC 3.1.2.6)                         | COG0491        |
| atEc_0213        | tEc_0200     | FIG005121: SAM-dependent methyltransferase (EC 2.1.1.-)               | COG0500        |
| <b>atEc_0417</b> | -            | <b>eKatE, Catalase</b>                                                | <b>COG0753</b> |
| atEc_0676        | tEc_0582     | Glutamate--cysteine ligase archaeal (EC 6.3.2.2)                      | COG2170        |
| atEc_0777        | tEc_0682     | Ferric uptake regulation protein FUR                                  | COG0735        |
| atEc_0983        | tEc_0810     | Non-specific DNA-binding protein Dps                                  | COG0783        |
| atEc_1009        | tEc_0836     | Uncharacterized glutathione S-transferase-like protein                | COG0625        |
| atEc_1020        | tEc_0847     | Glutaredoxin 1                                                        | COG0695        |
| atEc_1098        | tEc_0925     | Hydroxyacylglutathione hydrolase (EC 3.1.2.6)                         | COG0491        |
| atEc_1102        | tEc_0929     | Nicotinate phosphoribosyltransferase (EC 2.4.2.11)                    | COG1488        |
| atEc_1121        | tEc_0948     | Paraquat-inducible protein A                                          | COG2995        |
| atEc_1122        | tEc_0949     | Paraquat-inducible protein B                                          | COG3008        |
| atEc_1123        | tEc_0950     | Paraquat-inducible protein B                                          | COG3009        |
| atEc_1231        | tEc_1056     | Glutaredoxin 2                                                        | COG2999        |
| atEc_1286        | tEc_1111     | NAD-dependent protein deacetylase of SIR2 family                      | COG0846        |
| atEc_1499        | tEc_1316     | Fumarate and nitrate reduction regulatory protein                     | COG0664        |
| atEc_1624        | tEc_1424     | NAD-dependent glyceraldehyde-3-phosphate dehydrogenase (EC 1.2.1.12)  | COG0057        |
| atEc_1663        | tEc_1461     | Uncharacterized GST-like protein yncG                                 | COG0625        |
| atEc_1690        | tEc_1494     | Organic hydroperoxide resistance protein                              | COG1764        |
| atEc_1936        | tEc_1676     | Glutathione S-transferase (EC 2.5.1.18)                               | COG0625        |
| atEc_1947        | tEc_1687     | Superoxide dismutase [Cu-Zn] precursor (EC 1.15.1.1)                  | COG2032        |
| atEc_1952        | tEc_1692     | Lactoylglutathione lyase (EC 4.4.1.5)                                 | COG0346        |
| atEc_1955        | tEc_1695     | Probable monothiol glutaredoxin GrIA                                  | COG0278        |
| atEc_1957        | tEc_1697     | Superoxide dismutase [Fe] (EC 1.15.1.1)                               | COG0605        |
| atEc_2012        | tEc_1753     | Glutathione peroxidase (EC 1.11.1.9)                                  | COG0386        |
| atEc_2035        | tEc_1774     | <b>KatE, Catalase (EC 1.11.1.6)</b>                                   | COG0753        |
| atEc_2072        | tEc_1811     | Nicotinamidase (EC 3.5.1.19)                                          | COG1335        |
| atEc_2075        | tEc_1814     | NAD-dependent glyceraldehyde-3-phosphate dehydrogenase (EC 1.2.1.12)  | COG0057        |
| atEc_2129        | tEc_1869     | Paraquat-inducible protein A                                          | COG2995        |
| atEc_2130        | tEc_1870     | Paraquat-inducible protein B                                          | COG3008        |
| atEc_2724        | tEc_2386     | Probable glutathione S-transferase (EC 2.5.1.18), YfcF homolog        | COG0625        |
| atEc_2725        | tEc_2387     | Probable glutathione S-transferase (EC 2.5.1.18), YfcG homolog        | COG0625        |
| atEc_3117        | tEc_2706     | Glutaredoxin-like protein NrdH                                        | COG0695        |
| atEc_3131        | tEc_2720     | Glutamate--cysteine ligase (EC 6.3.2.2)                               | COG2918        |
| -                | tEc_2780     | Organic hydroperoxide resistance transcriptional regulator            | ENOG4111Y81    |
| atEc_3470        | tEc_3055     | Glutathionylspermidine synthase (EC 6.3.1.8)                          | COG0754        |
| atEc_3471        | tEc_3056     | Uncharacterized GST-like protein yghU                                 | COG0625        |
| atEc_3474        | tEc_3060     | Rubredoxin                                                            | ENOG4111JT6    |
| atEc_3512        | tEc_3106     | Similarity with glutathionylspermidine synthase (EC 6.3.1.8), group 1 | COG0754        |
| atEc_3577        | tEc_3172     | Glutathione S-transferase, omega (EC 2.5.1.18)                        | COG0435        |
| atEc_3682        | tEc_3277     | Aerobic respiration control sensor protein arcB (EC 2.7.3.-)          | COG2198        |
| atEc_3859        | tEc_3456     | Competence protein F homolog, phosphoribosyltransferase domain        | COG1040        |
| atEc_3893        | tEc_3490     | Gamma-glutamyltranspeptidase (EC 2.3.2.2)                             | COG0405        |
| atEc_3944        | tEc_3541     | Glutathione reductase (EC 1.8.1.7)                                    | COG1249        |
| atEc_3985        | tEc_3574     | Cytochrome c551 peroxidase (EC 1.11.1.5)                              | COG1858        |
| atEc_4069        | tEc_3658     | Uncharacterized GST-like protein yibF                                 | COG0625        |
| atEc_4092        | tEc_3676     | Glutaredoxin 3 (Grx3)                                                 | COG0695        |
| atEc_4458        | tEc_3984     | Manganese superoxide dismutase (EC 1.15.1.1)                          | COG0605        |
| atEc_4496        | tEc_4022     | <b>KatG, Peroxidase (EC 1.11.1.7)</b>                                 | COG0376        |
| atEc_4514        | tEc_4042     | OxyR, Hydrogen peroxide-inducible genes activator                     | ENOG410XNR2    |
| atEc_4604        | tEc_4132     | Zinc uptake regulation protein ZUR                                    | COG0735        |
| atEc_4620        | tEc_4149     | Regulatory protein SoxS                                               | ENOG4111IXA    |
| atEc_4621        | tEc_4150     | Redox-sensitive transcriptional activator SoxR                        | COG0789        |
| atEc_4750        | tEc_4262     | Nitrite-sensitive transcriptional repressor NsrR                      | COG1959        |
| atEc_4758        | tEc_4270     | Similarity with glutathionylspermidine synthase (EC 6.3.1.8), group 1 | COG0754        |

Genes involved in oxidative stress responses were searched against the whole genes in atEc and tEc strains with a key phrase “oxidative stress” using the CLgenomics software. An orthologous group that each protein belongs to is shown with its eggNOG ID (<http://eggnogdb.embl.de/>).
